# Supplementary material for: Me, Myself, and I: Neural Activity for Self versus Other across Development
Source: MDPI journal article supplement (doi:10.3390/children10121914), 2023-12-12

## Supplement information

*Table S1. MRI parameters*

|                             | MP-RAGE   | EPI_fmRI                      |
|-----------------------------|-----------|-------------------------------|
| Number of Slices            | 208       | 64                            |
| Slice thickness (mm)        | 1         | 2                             |
| Distance factor (%)         | 0         | 0                             |
| FOV Read (mm)               | 256       | 200                           |
| FOV Phase (mm)              | 256       | 200                           |
| Repetition Time (ms)        | 2000      | 1000                          |
| Echo Time (ms)              | 2,47      | 30                            |
| Inversion Time (ms)         | 900       | x                             |
| Flip Angle (deg)            | 8         | 80                            |
| Fat Suppression             | x         | Yes                           |
| Number of measurements      | x         | 180                           |
| Base Resolution             | 256       | 100                           |
| Phase Resolution            | 256       | 100                           |
| Phase Partial Fourier       | 7\8       | Off                           |
| Slice Partial Fourier       | 7\8       | Off                           |
| Interpolation               | Off       | Off                           |
| Acceleration mode           | Grappa    | SimultaneousMultiSlices (SMS) |
| Acceleration factor         | 2         | 2                             |
| Acceleration factor Slice   | x         | 4                             |
| Acceleration Refrence Lines | 24        | 24                            |
| B0 Shim mode                | Tune Up   | Standard                      |
| B1 Shim mode                | TrueForm  | TrueForm                      |
| Echo spacing (ms)           | 7,4       | 0,57                          |
| Bandwidth (Hz/Px)           | 200       | 2272                          |
| EPI factor                  | x         | 100                           |
| Gradient Mode               | Whisper   | Performance                   |
| Voxel Size (mm)             | 1x1x1     | 2x2x2                         |
| Acquisition Time            | 4min06sec | 3min12sec                     |

**Figure S1. Results of the paired *t*-test analyses between the 4 different age groups, and the brain activity for the perception of others.**

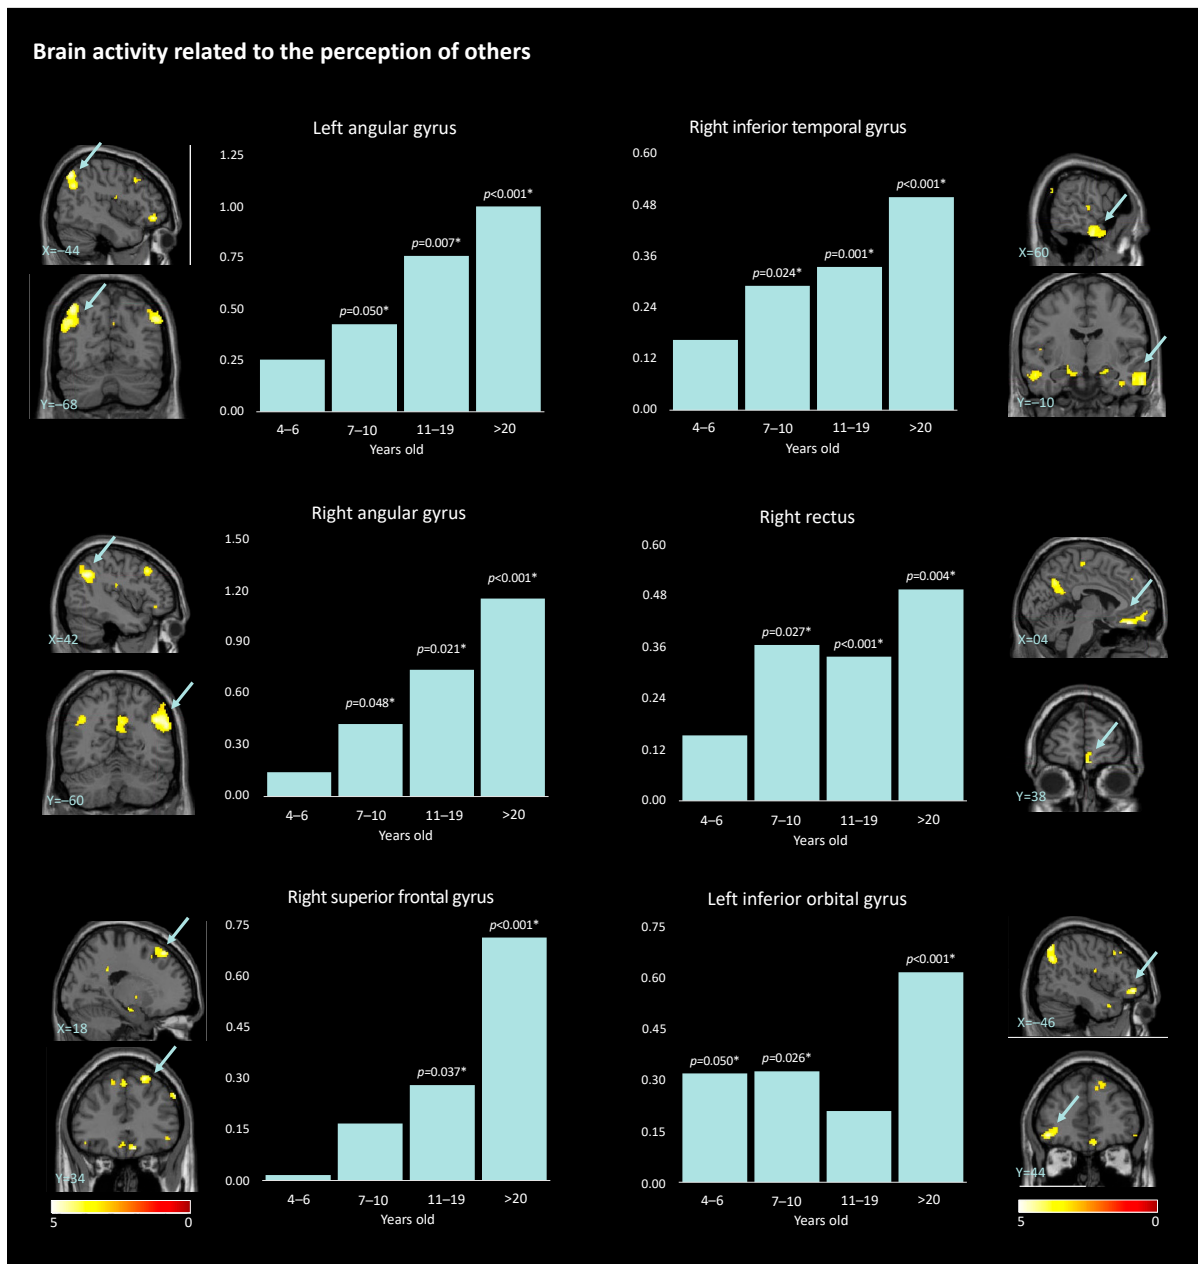

Supplement: s1 [file s1]
